# Supplementary material for: MoMI-G: modular multi-scale integrated genome graph browser
Source: Springer Nature journal article supplement (doi:10.1186/s12859-019-3145-2), 2019-11-05

**A**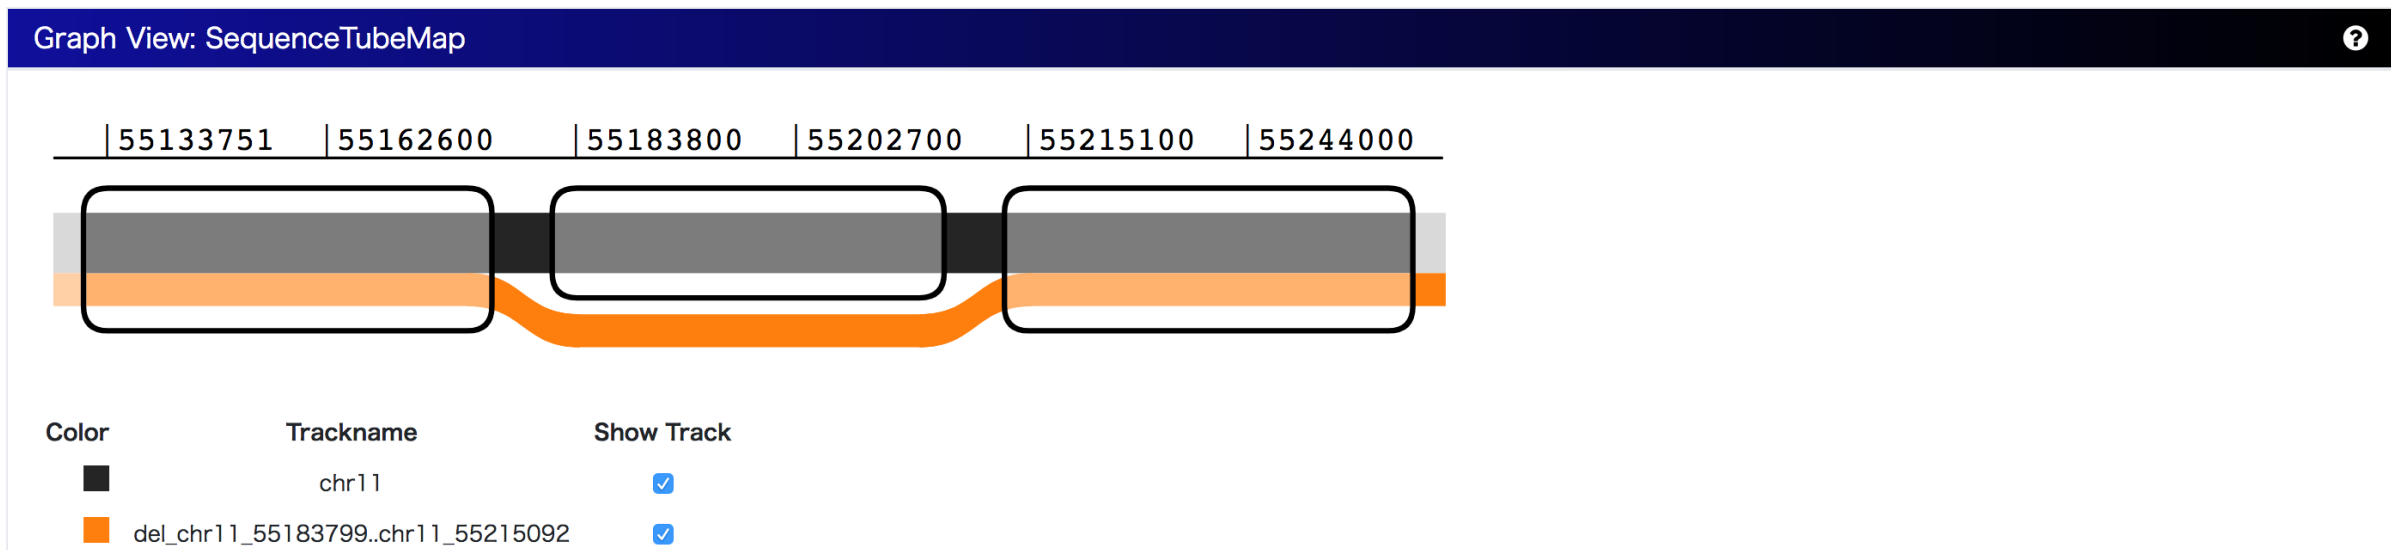**B**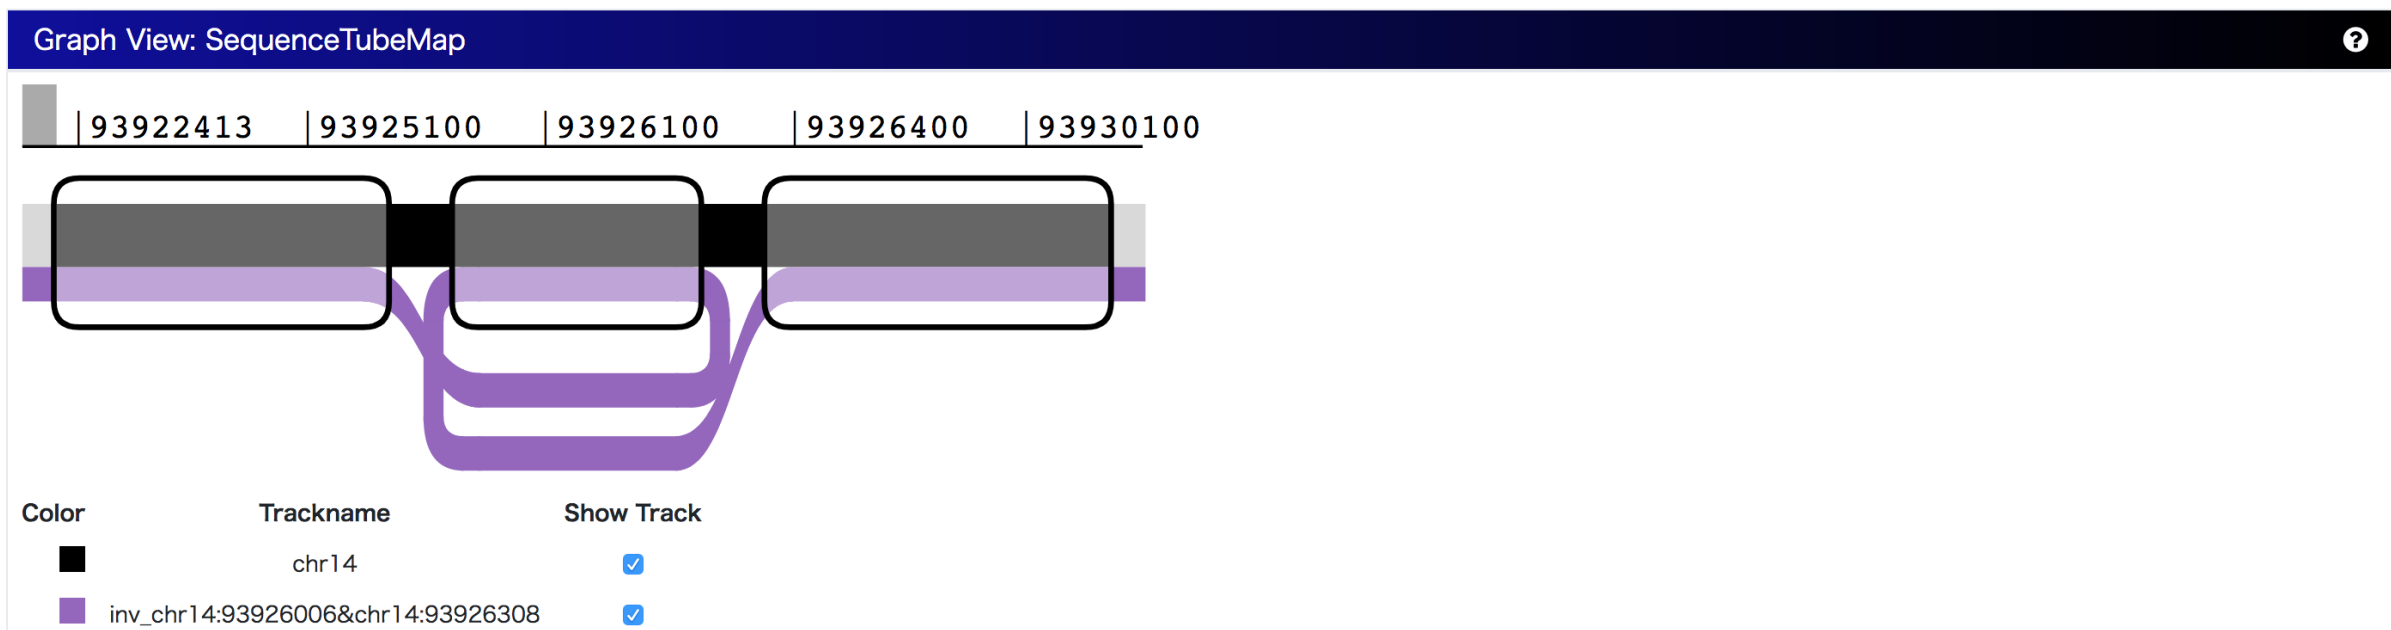**C**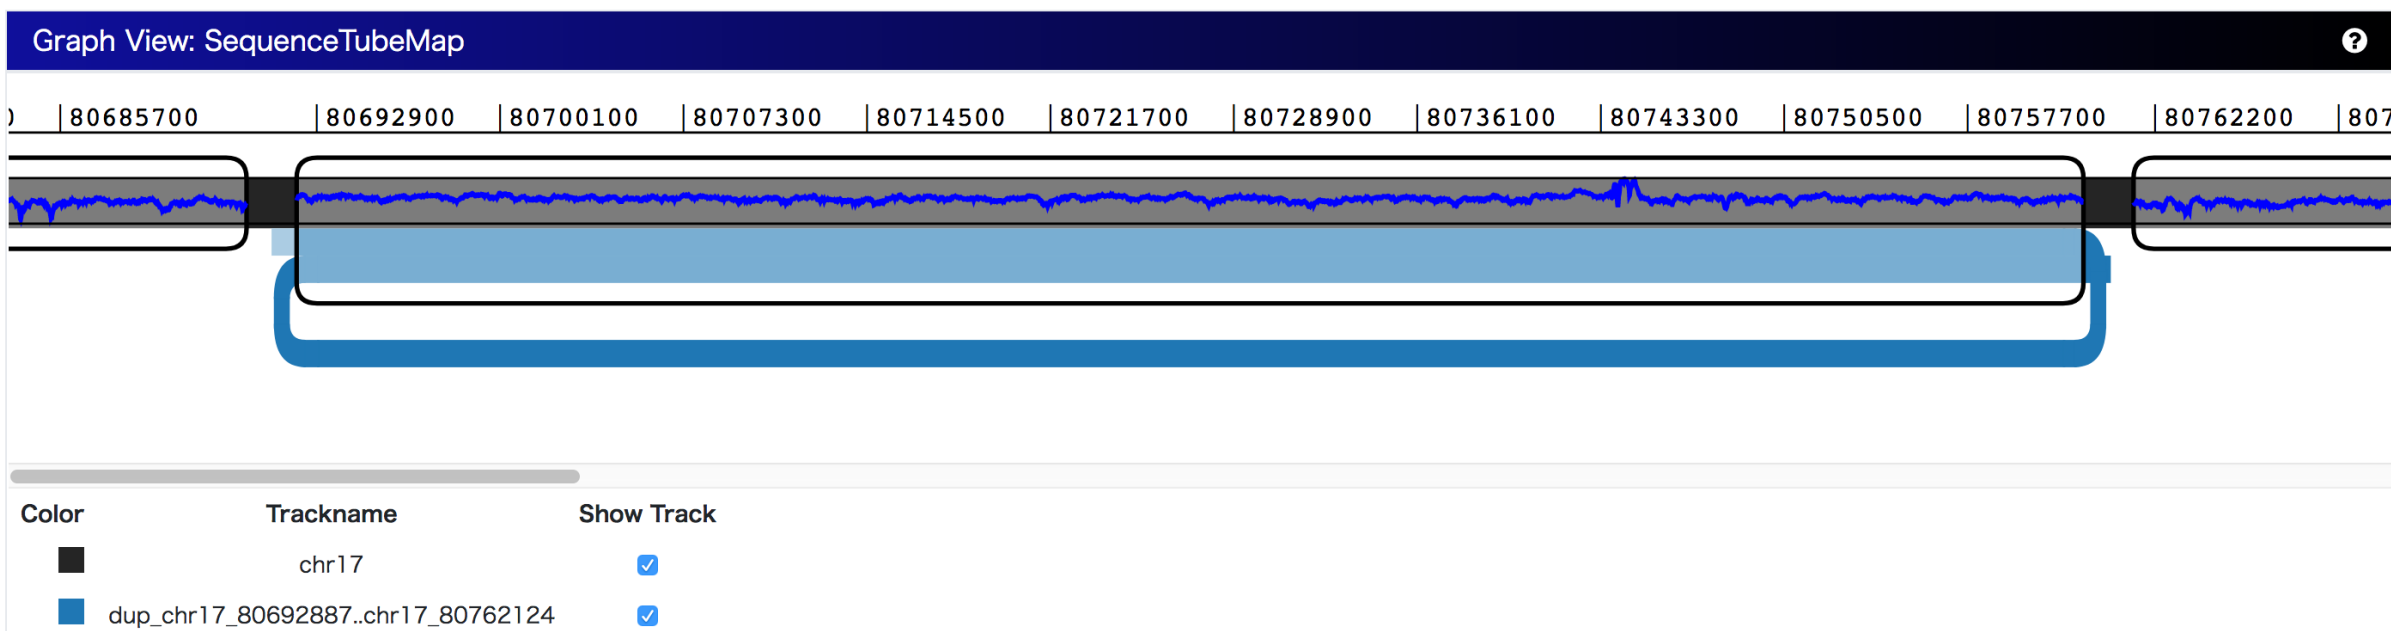

Supplement: 12859_2019_3145_MOESM4_ESM.pdf [file 12859_2019_3145_MOESM4_ESM.pdf]
